1 **Title:** Tropomyosin in mugwort cross-reacts to house dust mite, eliciting non-Th2  
2 response in allergic rhinitis patients sensitized to house dust mite

3 **Authors:** Feng Lan<sup>1,2\*</sup>, Limin Zhao<sup>1,2\*</sup>, Su Duan<sup>1,2</sup>, Nan Zhang<sup>3</sup>, Haibo Zhang<sup>1,2</sup>,  
4 Ming Zheng<sup>1,2</sup>, Qiqi Wang<sup>1,2</sup>, Xu Zhang<sup>1,2</sup>, Xiangdong Wang<sup>1,2</sup>, Sun Ying<sup>4</sup>, Claus  
5 Bachert<sup>3</sup>, Luo Zhang<sup>1,2</sup>

6 \*: These authors contributed equally to the study.

7 **Affiliations:**

8 1.Beijing Key Laboratory of Nasal Diseases, Beijing Institute of Otolaryngology,  
9 Beijing, China;

10 2.Department of Otolaryngology-Head and Neck Surgery and Department of Allergy,  
11 Beijing Tongren Hospital, Capital Medical University, Beijing, China;

12 3.Upper Airways Research Laboratory, ENT Department, Ghent University, Ghent,  
13 Belgium;

14 4.Department of Immunology, School of Basic Medical Science, Capital medical  
15 University, Beijing, China;

16 **Corresponding authors:**

17 Prof. Luo Zhang, Beijing Institute of Otolaryngology, Department of Otolaryngology-  
18 Head and Neck Surgery, Capital Medical University, No. 17, HouGouHuTong,  
19 Dongcheng District, Beijing 100730, China. E-mail: [dr.luozhang@139.com](mailto:dr.luozhang@139.com)

20 **Conflict of interest:** The authors declare that they have no conflict of interest.

21 **Manuscript word count:** 4393, **Table: 2, Figure: 3**

22 **Short title:** Cross-reactivity between mugwort and HDM tropomyosin

23

24 **ABSTRACT**

25 **Background:** Mugwort and house dust mite (HDM) are two of the most common  
26 inhalant allergens in Asia; however, whether or not mugwort affects polysensitized  
27 HDM<sup>+</sup> allergic rhinitis (AR) patients has not been elucidated.

28 **Methods:** Overall, 15884 AR outpatients were assessed for clinical status. Amino acid  
29 sequences of mugwort were determined by mass spectrometry. Afterward, cross-  
30 reactivity between mugwort tropomyosin and *Dermatophagoides pteronyssinus* 10  
31 (Der p10) was analysed by ELISA inhibition and basophils activation experiments. To  
32 compare immunologic responses eliciting by two different tropomyosins, peripheral  
33 blood mononuclear cells (PBMCs) of HDM-monosensitized patients were stimulated  
34 by mugwort, HDM, Der p10 and synthetic peptides representing mugwort  
35 tropomyosin respectively.

36 **Results:** Polysensitized HDM<sup>+</sup>AR patients were mainly sensitized to cat and  
37 mugwort, and the positive rate of monosensitized HDM<sup>+</sup>AR out-clinic patients was  
38 increased during the mugwort pollen season. Mugwort tropomyosin protein had  
39 similar structural domains to HDM tropomyosin, Der p10. ELISA inhibition  
40 experiment showed synthetic mugwort tropomyosin peptide inhibited IgE binding to  
41 Der p10; mugwort tropomyosin peptide activated basophils which were primed by  
42 HDM-specific IgE. Unlike HDM and Derp 10, mugwort and mugwort tropomyosin  
43 mainly induced IFN- $\gamma$  and IL-17, release in PBMCs of monosensitized HDM<sup>+</sup>AR  
44 patients, but not IL-5.

45 **Conclusions:** Pan-allergen tropomyosin is a major protein accounting for the cross-  
46 reactivity between mugwort and HDM, which reminds HDM<sup>+</sup> patients to reduce

47 mugwort exposure in mugwort pollen season in virtue of the tropomyosin induced

48 mild inflammation.

49 **Keywords:** cross-reactivity, house dust mite, mugwort

## 50 INTRODUCTION

51 Allergic rhinitis (AR) is an upper airway allergic inflammatory disease, which causes  
52 symptoms of sneeze, runny nose, nasal obstruction and itchy nose, and is mediated by  
53 type 2 helper (Th2) cells and immunoglobulin E (IgE)<sup>1,2</sup>. Among the common  
54 triggering allergens, house dust mites (HDM), mould spores and animal dander  
55 mainly cause symptoms of perennial allergic rhinitis, whereas, a large variety of  
56 pollens from different geographical regions contributes to symptoms of seasonal  
57 allergic rhinitis<sup>3</sup>. Some AR patients are found to be polysensitized to more than one  
58 allergen<sup>4</sup>, and an increasing number of sensitizations strongly predisposes AR patients  
59 to allergic asthma<sup>5,6</sup>. Thus, the treatment for polysensitized AR patients has a close  
60 relationship with asthma management<sup>7</sup>.

61 Allergen specific immunotherapy (AIT) is an effective therapeutic method for  
62 monosensitized AR patients<sup>7</sup>. However, management approaches to polysensitized  
63 AR patients by AIT are not standardized yet. There are intercontinental differences in  
64 allergen products available for AIT in polysensitized patients<sup>8</sup>. Desensitization to the  
65 most clinically relevant allergen is often used to treat polysensitized patients in  
66 Europe and in China, while mixtures of extracts are recommended in the United  
67 States<sup>9,10</sup>. Differences in therapeutic effects of single allergen-specific immunotherapy  
68 have been shown: more effective in reducing the symptoms are observed in those of  
69 monosensitized patients than that of polysensitized patients treated with the same  
70 dose<sup>11,12</sup>; no obvious change in HDM-specific IgE production and a lower  
71 concentration of HDM-specific IgG4 is noticed in polysensitized patients compared  
72 with those of monosensitized patients after AIT<sup>12,13</sup>. Polysensitization is mainly  
73 caused by cross-reactivity among closely related allergens, or allergens from other  
74 sources. The identification of primary causal allergen(s) and sensitization to cross-

75 reacting allergens helps us find efficient ways to treat polysensitized AR patients in  
76 the near future.

77 HDM and mugwort have been regarded as the two most common and clinically  
78 relevant sensitizing allergens in AR patients in Asia <sup>14</sup>. HDM cross-reacts with  
79 allergens from other invertebrates, including other species of mites, insects, mollusks,  
80 and crustaceans<sup>15</sup>. It is not clear whether or not there is cross-reactivity between HDM  
81 and mugwort; consequently, whether or not mugwort affects polysensitized HDM<sup>+</sup>AR  
82 patients. Thus, it would clearly be of interest to explore whether HDM and mugwort  
83 share similar structural features that elicit a common immunologic response in  
84 polysensitized and monosensitized patients. In view of this, the present study has  
85 specifically investigated cross-reactivity between HDM and mugwort in HDM<sup>+</sup>AR  
86 patients.

## 87 MATERIAL AND METHODS

### 88 Study design and subjects

89 Subjects with AR based on criteria of the Allergic Rhinitis and its Impact on Asthma  
90 (ARIA) consensus statement<sup>16</sup> were recruited consecutively from the allergy-  
91 rhinology outpatient clinic of Beijing Tongren Hospital. On recruitment, each subject  
92 completed a questionnaire to record demographic data, nasal symptom severity, and  
93 history of asthma; and blood samples were collected from each subject for analysis of  
94 serum specific IgE antibodies. Peripheral mononuclear cells (PBMCs) were also  
95 prepared from blood samples of some HDM<sup>+</sup>AR patients and healthy controls for this  
96 study. None of the subjects had received any allergen-specific immunotherapy or  
97 monoclonal antibody treatment. The study was approved by the Medical Ethics  
98 Committee of Beijing Tongren Hospital, and all patients provided written informed  
99 consent before entry into the study and collection of any samples.

### 100 Serum antigen-specific IgE measurements

101 The presence of IgE antibodies in blood was determined using a EUROLINE Atopy  
102 Screen (DP 3713 E; Lubeck Germany), which comprised two sets of allergens; one  
103 with a mix of aeroallergens [including tree mix (willow, poplar, elm), common  
104 ragweed, mugwort, house dust mite mix (*Dermatophagoides pteronyssinus* (Der p),  
105 *Dermatophagoides farina* (Der f), house dust, cat, dog, cockroach German, mould mix  
106 (*Penicillium notatum*, *Cladosporium herbarum*, *Aspergillus fumigatus*, *Alternaria*  
107 *alternata*) and hops], and one with a mix of food allergens [including egg white,  
108 cow's milk, peanut, soybean, beef, mutton, sea fish mix (codfish, lobster, scallop),  
109 shrimp, and crab]. Furthermore, concentrations of Der f2 specific IgE, Der p1 specific  
110 IgE, and total IgE were also measured using the ImmunoCAP system

111 (Immunodiagnosics; Thermo Fisher Scientific, Uppsala, Sweden). Allergen-specific  
112 IgE >0.35 kU/L was considered as positive.

### 113 **Mass Spectrometry**

114 Prior to analysis, 100 mg samples of mugwort (*Artemisia annua* (A. annua) and  
115 *Artemisia sieversian* (A. sieversian)) were separately prepared as peptide solutions by  
116 denaturing and treatment with protease trypsin according to the method described by  
117 León and colleagues<sup>17</sup>; and then analysed in a Triple-TOF 6600 mass spectrometer  
118 (Sciex, United States) fitted with a Nanospray III source (Sciex). The ion spray  
119 voltage was 2300 V, declustering potential 80 V, curtain gas 35 psi, nebulizer gas  
120 5psi, and interface heater temperature 150 °C. The peptides were introduced into the  
121 mass spectrometer via Nona 415 liquid chromatography column (Sciex) eluted with  
122 water/acetonitrile/formic acid (buffer B: 2/98/0.1%). In this regard, samples (4 µL)  
123 were injected onto a C18 desalted column (3 µm, 120Å, 350 µm×0.5 mm), and  
124 separated onto a C18 analysis column (3 µm, 120Å, 75 µm×150 mm) with gradients  
125 ranging from 5 to 16% buffer B in the first 25 min, from 16 to 26% buffer B in the  
126 next 20 min, from 26 to 40% buffer B in the following 3 min, from 40 to 80% buffer  
127 B in the next 5 min, and finally from 80 to 5% buffer B in the final 7 mins; at a flow  
128 rate of 0.6 µL/min. The peptides present in the samples, were matched to the UniProt  
129 *Artemisia annua* databases, and identified for the corresponding proteins. A  
130 standardised preparation of common repeat peptide sequences of tropomyosin protein  
131 from both A. annua and A. sieversian (SynPeptide, Shanghai, China) was selected for  
132 further functional analysis as follows: VGSPDESYEDFTNSLPSNECR.

### 133 **Comparative modelling of three-dimensional (3D) protein structures**

134 Homology modelling for tropomyosin of mugwort (*A. annua* and *A. sieversian*) was  
135 established on the SWISS-MODEL server. The modelling template was selected from  
136 RCSB PDB Data Bank (PDB ID: 1f7s and 1xwv) and molecular dynamics  
137 simulations were carried out for mugwort using AMBER ff14SB force field. The  
138 structures were explicitly solvated with a water box from the outermost atoms of the  
139 molecules. Periodic boundary conditions were used and the net negative charge  
140 neutralized with Na<sup>+</sup> counterion. The best model was selected for the analysis of the  
141 similarity between tropomyosin of mugwort and Der p10. The structure of Der p10  
142 was established on the SWISS-MODEL server.

#### 143 **HDM-specific IgE blockage by synthesised mugwort tropomyosin peptides**

144 Serum samples of 15 HDM<sup>+</sup>AR patients each with a high or low level of HDM-  
145 specific IgE were used to assess the IgE blocking potential of synthetic peptides of  
146 mugwort tropomyosin. Briefly, 200 µL of serum from HDM<sup>+</sup>AR patients were  
147 incubated with or without mugwort tropomyosin peptides (1000 ng/mL for each) for 1  
148 h at room temperature, and at the end of incubation the serum samples were analysed  
149 for the concentrations of Der p1-specific IgE and Der f2-specific IgE using the  
150 ImmunoCAP system.

#### 151 **Basophil activation test**

152 PBMCs isolated from non-allergic donors, 5×10<sup>5</sup> cells were stripped in 2ml ice cold  
153 lactic acid buffer (0.13M KCl, 0.05M NaCl, 0.01M lactic acid, pH=3.9) for 30s as  
154 described before<sup>18</sup>. After washing 3 times by PBS, cells were pre-incubated with sera  
155 from HDM-allergic individuals for 1 h at 37°C. And then, cells were stimulated by  
156 different concentrations of mugwort tropomyosin or Derp 10 (50, 500 ng/mL) in  
157 hepes buffer containing IL-3 (R&D, Minneapolis, Minnesota, USA). In the



158 meanwhile, cells exposed to FLMP (Sigma, St. Louis, USA)) were taken as a positive  
159 control. The reaction was stopped by EDTA buffer (20 mM). In the end, PBMCs were  
160 stained with basophil surface markers: CD123BV650, CCR3-APC-fire750 and CD63-  
161 PE (Biolegend, San Diego, CA, USA), and the percentages of CD63<sup>+</sup>CD123<sup>+</sup>CCR3<sup>+</sup>  
162 cells were analysed by Flowjo software.

### 163 **ELISA inhibition experiment**

164 Plates were pre-coated with Der p10 obtained from CUSABIO company (Wuhan,  
165 China) overnight at 4°C. Non-specific binding in the well was reduced by incubation  
166 with PBS supplemented with 1% BSA and 0.05% tween 20 for 6 h at room  
167 temperature. Inhibition was performed by adding sera from HDM monosensitized  
168 patients with synthetic mugwort tropomyosin peptides (50, 500 ng/mL), and sera  
169 without peptides were taken as non-inhibition conditions. Anti-human IgE (2 ug/mL,  
170 NOVUS, USA) were added, followed by streptavidin-HRP conjugated secondary  
171 antibodies (diluted 1:2,000; EasyBio, Beijing, China). Absorbance at 405 nm was  
172 determined using an ELISA reader (BioTek, Vermont, USA). All experiments were  
173 performed in duplicate. Percent inhibition was calculated using the following  
174 equation: percent inhibition = 100- [(OD of serum with tropomyosin peptide /OD of  
175 serum without peptide) × 100].

### 176 **Stimulation of PBMCs *ex vivo***

177 PBMCs were isolated from the blood of 6 healthy and 12 AR donors using Ficoll-  
178 Hypaque density gradient centrifugation according to the standard protocol  
179 (Lymphoprep<sup>TM</sup>, Nycomed Pharma, Oslo, Norway). Cells were plated at a density of  
180 1x10<sup>6</sup> cells/well in a 24-well plate in 0.5 mL RPMI 1640 (Gibco, USA) culture  
181 medium alone, or with HDM (Der p1 extract; 0.2, 1, 5 µg/mL; GREER Laboratories,

182 Lenoir, NC, USA), mugwort (1, 10, 100, 1000 ng/mL; locally prepared in Beijing  
183 Tongren Hospital), or mugwort tropomyosin peptides in the culture medium, and then  
184 incubated at 37 °C in 5% CO<sub>2</sub> for 48 h. At the end of incubation, the cell suspensions  
185 were collected and the supernatants were assessed for IL-5, IL-17, and IFN- $\gamma$  using  
186 Luminex xMAP suspension array technology in a Bio-Plex 200 system (Bio-Rad, MI).  
187 All cytokine kits were purchased from R&D Company and the cytokines were  
188 expressed as pg/mL.

### 189 **Statistical analysis**

190 Statistical analysis was performed using the SPSS version 22.0 software package  
191 (IBM Corp, Armonk, NY, USA). Categorical variables were described using  
192 frequencies and/or percentages and continuous variables were presented as means  $\pm$   
193 standard deviation (SD). Multiple logistic regression was used to analyse the possible  
194 risk factors for polysensitized HDM<sup>+</sup>AR patients. The influence of polysensitization  
195 on asthma development was assessed by the Chi-squared test. The prevalence of  
196 different allergens in HDM<sup>+</sup>AR patients was estimated using Fisher's exact test and  
197 logistic regression. The Wilcoxon test was used for paired between-group  
198 comparisons of the effect of specific antigen stimulation on the release of cytokines  
199 from PBMCs, and the effect of mugwort peptides on blocking Der p1 and Der f2  
200 sIgEs. *P* values of less than 0.05 were regarded as statistically significant.

## 201    **RESULTS**

### 202    **Mugwort may affect the prevalence of HDM<sup>+</sup>AR patients**

203    A total of 497 HDM<sup>+</sup>AR patients were recruited into the study. Overall, 64.6% of the  
204    HDM<sup>+</sup>AR patients were monosensitized, and 35.4% polysensitized (**Table 1**).  
205    Comorbid asthma was more prevalent in 19.32% of all polysensitized AR patients  
206    compared to in 9.03% of all monosensitized AR patients ( $p = 0.001$ ). Type of  
207    sensitizing allergens was further analysed in polysensitized HDM<sup>+</sup>AR patients in  
208    parallel with the HDM-specific IgE level. Regardless of the level of HDM-specific  
209    IgE detected, sensitization was greatest to inhalant allergens in the polysensitized  
210    HDM<sup>+</sup>AR patients (**Figure 1A**). The five most prevalent inhalant allergens in the  
211    polysensitized HDM<sup>+</sup>AR patients were cat (27.8%, 95% CI:21.2%-34.5%), mugwort  
212    (26.1%, 95% CI:19.6%-32.7%), house dust (21.6%, 95% CI:15.5%-27.7%),  
213    cockroach (20.5%, 95% CI:14.4%-26.5%) and hops (10.8%, 95% CI: 6.2%-15.4%)  
214    (**Figure 1B**). The number of monosensitized HDM<sup>+</sup>AR patients was increased from  
215    July to August, and the number of polysensitized HDM<sup>+</sup>AR patients from July to  
216    September (**Figure 1C**); which appeared to follow the trend of the mugwort pollen  
217    season seen from July to early September in 2018<sup>19</sup>.

### 218    **Tropomyosin was involved in mugwort-HDM cross-reactivity due to the similar** 219    **structure**

220    Alignment of peptide amino acid sequences of *A. annua* and *A. sieversian* allergens in  
221    UniProt *Artemisia annua* databases indicated the presence of cross-reactivity protein  
222    tropomyosin (**Table 2**). Similarly, the presence of cross-reactivity proteins profilin  
223    and lipid transfer protein were also found in both *A. annua* and *A. sieversian* (data not  
224    shown). However, alignment analysis of the amino acid sequences demonstrated for

225 the tropomyosin proteins in mugwort with the amino acid sequences for Der p10 (a  
226 member of the tropomyosin group protein in HDM), showed that there was no  
227 homology. Comparative 3D-modeling of the tropomyosin protein structures of  
228 mugwort vs Der p10, optimized using AMBER14 molecular dynamics software,  
229 demonstrated that the tropomyosin proteins in mugwort contained  $\alpha$ -helices and  $\beta$ -  
230 sheets, which were comparable to Der p10 (**Figure 2A**).

231 Pre-incubation serum samples of monosensitized HDM<sup>+</sup>AR patients with mugwort  
232 tropomyosin peptide significantly decreased the concentrations of HDM specific-sIgE  
233 in the serum (**Figure 2B**). Furthermore, mugwort tropomyosin peptide (50 ng/ml)  
234 inhibited IgE binding to Der p10 ranging from 2.4% to 32.1% (**Figure 2C**). As shown  
235 in **Figure 2D**, the activation of basophils, which pre-sensitized by HDM specific IgE,  
236 occurred with exposure to Der p10 and synthetic tropomyosin mugwort peptide in 2  
237 out of 8 non-allergic patients, suggesting the similar structure domains of tropomyosin  
238 in mugwort and HDM are functional.

#### 239 **A. annua and synthetic tropomyosin of mugwort induced non-Th2 response in** 240 **PBMCs of monosensitized HDM<sup>+</sup>AR patients**

241 Compared to medium controls, HDM stimulated PBMCs isolated from  
242 monosensitized HDM<sup>+</sup>AR patients (n = 6) to produce high levels of IL-5 (0.59-61.56  
243 pg/mL) and IL-17 (0.91-5.27 pg/mL), but not IFN- $\gamma$  (**Figure 3A**). In contrast, HDM  
244 induced PBMCs isolated from healthy controls (n = 6) to release IL-17 (0.71-1.32  
245 pg/mL) and IFN- $\gamma$  (0.71-1.79 pg/mL), but not IL-5 (**Figure 3A**). Interestingly, *A.*  
246 *annua* stimulated PBMCs from monosensitized HDM<sup>+</sup>AR patients (n = 8) to produce  
247 IL-17 (1.36-2.24 pg/mL) and IFN- $\gamma$  (3.7-4.79 pg/mL), but not IL-5 (**Figure 3B**);  
248 while such stimulation only induced the production of IFN- $\gamma$  (1.79-47.45 pg/mL), but

249 not IL-5 or IL-17 by PBMC of healthy controls (n = 5) (**Figure 3B**). Generally, the  
250 frequency of *A. annua*-induced release of IL-17 and IFN- $\gamma$  was 25% and 12.5%,  
251 respectively, from PBMCs of monosensitized HDM<sup>+</sup>AR patients; and the frequency  
252 of HDM-induced release of IL-5 and IL-17 was 66.7% and 83.3%, respectively, from  
253 PBMCs of monosensitized HDM<sup>+</sup>AR patients (**Figure 3C**), suggesting that HDM is  
254 more effective than *A. annua* in inducing inflammation in HDM<sup>+</sup>AR patients.

255 To confirm that tropomyosin may be responsible for *A. annua* extract-induced non-  
256 Th2 response in monosensitized HDM<sup>+</sup>AR patients, PBMCs from monosensitized  
257 HDM<sup>+</sup>AR patients were incubated with tropomyosin mugwort peptides and Der p10.  
258 Finally, mugwort peptide induced the synthesis and release of IFN- $\gamma$ , with about 20%  
259 frequency and 60% of subjects released IL-17; whereas Der p10 induces the  
260 frequency of IL-5 and IL-17 were 20% and 60% respectively (**Figure 3D**).

261 **DISCUSSION**

262 We demonstrated for the first time that cross-reactive protein tropomyosin in mugwort  
263 and HDM sharing similar structural domains is responsible for the cross-reactivity  
264 between HDM and mugwort. However, unlike HDM and Derp 10, *A. annua* and  
265 mugwort tropomyosin peptide induced Th1 and Th17 in PBMCs of HDM  
266 monosensitized AR patients, but not Th2 response.

267 Tropomyosin, a pan-allergen, belongs to a family of phylogenetically conserved  
268 proteins with multiple isoforms present in muscle and non-muscle cells of vertebrates  
269 and invertebrates<sup>20</sup>. It has been known that tropomyosin from HDM and cockroaches  
270 share high sequence homology with that of shellfish, which unsurprisingly results in  
271 cross-reactivity among HDM, cockroach and food allergens<sup>21-23</sup>. Mugwort is the most  
272 important outdoor seasonal allergen in Asia<sup>4,24</sup>. Our data have shown that a large  
273 number of polysensitized HDM<sup>+</sup>AR patients are sensitized to mugwort and the  
274 number of monosensitized HDM<sup>+</sup>AR patients was increased from July to August.  
275 Mite densities indeed vary with seasons and areas. Reportedly, three peaks for the  
276 domestic mites density in Beijing appear in September to October, January and May  
277 <sup>25</sup>. Thus, the increased number of monosensitized HDM<sup>+</sup>AR patients in July and  
278 August did be affected by mugwort. Although amino acid sequences of mugwort (*A.*  
279 *annua* and *A. sieversian*) tropomyosin proteins are different from that of HDM  
280 tropomyosin Der p10, 3D-modelling results show that the  $\alpha$ -helices and  $\beta$ -sheets in  
281 mugwort tropomyosin are similar to Der p10. Considering that the sequence of the  
282 same protein varies in different species and cross-reactivity is thought to occur when a  
283 protein of similar sequence, structure or family binds to T and B cell receptors<sup>26</sup>,

284 tropomyosin might be involved in mugwort-HDM cross-reactivity due to similar  
285 structure of tropomyosin in allergens.

286 The present study has indicated that stimulation of PBMCs of monosensitized  
287 HDM<sup>+</sup>AR patients with mugwort induced synthesis of IL-17 and IFN- $\gamma$ , whereas  
288 stimulation with HDM induced synthesis of IL-5 and IL-17. Our group has previously  
289 demonstrated that single-nucleotide polymorphisms (SNPs) in IL-17A and IL-17F  
290 gene regions are potentially associated with the development of AR and comorbid  
291 asthma in Chinese subjects<sup>27</sup>. Similarly, a study in Caucasian subjects has also  
292 demonstrated that there is an association between serum IL-17 and the severity of  
293 clinical symptoms in AR patients<sup>28</sup>. As mentioned above, the role of Th17 in the  
294 pathogenesis of AR cannot be excluded. Thus, the induction of IL-17 by mugwort  
295 from PBMCs in monosensitized HDM<sup>+</sup>AR patients may be associated with clinical  
296 symptoms of patients. In this study, the finding for Der p10-induced synthesis of IL-5  
297 in monosensitized HDM<sup>+</sup>AR patients was in accordance with the findings of  
298 stimulation by HDM. In the meanwhile, stimulation synthesized tropomyosin peptide  
299 of mugwort could induce IL-17 and IFN- $\gamma$  by PBMCs of HDM<sup>+</sup>AR subjects,  
300 suggesting that tropomyosin is responsible for the cross-reactivity between HDM and  
301 mugwort, eliciting non Th2 response.

302 In conclusion, we have for the first time demonstrated that mugwort tropomyosin  
303 shares similar  $\alpha$ -helices and  $\beta$ -sheets with Der p10, and therefore might play a role in  
304 eliciting a non-Th2 response in polysensitized HDM<sup>+</sup>AR patients in comparison to  
305 HDM. Since mugwort stimulation may be related to clinical symptoms of HDM  
306 sensitized patients, education and allergen avoid are required for HDM<sup>+</sup>AR patients in  
307 the autumn pollen season.

308

309

310 **Acknowledgements:** This work was supported by grants from the Beijing Nova  
311 Program of Science and Technology (Z191100001119117); Yong top-notch talent  
312 (2018000021223ZK12); the Beijing Hospitals Authority Youth Programme  
313 (QML20180201); Beijing Scientific and Technological overall plan  
314 (Z171100000117002); the Beijing advanced innovation center for food nutrition and  
315 human health (Beijing Technology and Business University, 20181045); and the  
316 Program for the Changjiang Scholars and Innovative Research Team (IRT13082).

317



318 **REFERENCES**

- 319 1. Akhouri S, House SA. Allergic Rhinitis. In: *StatPearls*. Treasure Island (FL):  
320 StatPearls Publishing  
321 Copyright © 2020, StatPearls Publishing LLC.; 2020.
- 322 2. Wang XD, Zheng M, Lou HF, et al. An increased prevalence of self-reported allergic  
323 rhinitis in major Chinese cities from 2005 to 2011. *Allergy*. 2016;71(8):1170-1180.
- 324 3. Wise SK, Lin SY, Toskala E, et al. International Consensus Statement on Allergy and  
325 Rhinology: Allergic Rhinitis. *Int Forum Allergy Rhinol*. 2018;8(2):108-352.
- 326 4. Lou H, Ma S, Zhao Y, et al. Sensitization patterns and minimum screening panels for  
327 aeroallergens in self-reported allergic rhinitis in China. *Sci Rep*. 2017;7(1):9286.
- 328 5. Matricardi PM, Dramburg S, Potapova E, Skevaki C, Renz H. Molecular diagnosis  
329 for allergen immunotherapy. *J Allergy Clin Immunol*. 2019;143(3):831-843.
- 330 6. Dogru M. Investigation of asthma comorbidity in children with different severities of  
331 allergic rhinitis. *American journal of rhinology & allergy*. 2016;30(3):186-189.
- 332 7. Tiotiu A, Plavec D, Novakova S, et al. Current opinions for the management of  
333 asthma associated with ear, nose and throat comorbidities. *Eur Respir Rev*.  
334 2018;27(150).
- 335 8. Mahler V, Esch RE, Kleine-Tebbe J, et al. Understanding differences in allergen  
336 immunotherapy products and practices in North America and Europe. *The Journal of*  
337 *allergy and clinical immunology*. 2019;143(3):813-828.
- 338 9. Calderón MA, Cox L, Casale TB, Moingeon P, Demoly P. Multiple-allergen and  
339 single-allergen immunotherapy strategies in polysensitized patients: looking at the  
340 published evidence. *The Journal of allergy and clinical immunology*.  
341 2012;129(4):929-934.
- 342 10. Li H, Chen S, Cheng L, et al. Chinese guideline on sublingual immunotherapy for  
343 allergic rhinitis and asthma. *Journal of thoracic disease*. 2019;11(12):4936-4950.
- 344 11. Bousquet J, Becker WM, Hejjaoui A, et al. Differences in clinical and immunologic  
345 reactivity of patients allergic to grass pollens and to multiple-pollen species. II.  
346 Efficacy of a double-blind, placebo-controlled, specific immunotherapy with  
347 standardized extracts. *J Allergy Clin Immunol*. 1991;88(1):43-53.
- 348 12. Kim KW, Kim EA, Kwon BC, et al. Comparison of allergic indices in monosensitized  
349 and polysensitized patients with childhood asthma. *J Korean Med Sci*.  
350 2006;21(6):1012-1016.
- 351 13. Kim JY, Han DH, Won TB, et al. Immunologic modification in mono- and poly-  
352 sensitized patients after sublingual immunotherapy. *Laryngoscope*.  
353 2019;129(5):E170-E177.
- 354 14. Cheng L, Chen J, Fu Q, et al. Chinese Society of Allergy Guidelines for Diagnosis  
355 and Treatment of Allergic Rhinitis. *Allergy Asthma Immunol Res*. 2018;10(4):300-353.
- 356 15. Sidenius KE, Hallas TE, Poulsen LK, Mosbech H. Allergen cross-reactivity between  
357 house-dust mites and other invertebrates. *Allergy*. 2001;56(8):723-733.
- 358 16. Brożek JL, Bousquet J, Agache I, et al. Allergic Rhinitis and its Impact on Asthma  
359 (ARIA) guidelines-2016 revision. *The Journal of allergy and clinical immunology*.  
360 2017;140(4):950-958.
- 361 17. León IR, Schwämmle V, Jensen ON, Sprenger RR. Quantitative assessment of in-  
362 solution digestion efficiency identifies optimal protocols for unbiased protein analysis.  
363 *Molecular & cellular proteomics : MCP*. 2013;12(10):2992-3005.
- 364 18. Cantillo JF, Puerta L, Fernandez-Caldas E, et al. Tropomyosins in mosquito and  
365 house dust mite cross-react at the humoral and cellular level. *Clin Exp Allergy*.  
366 2018;48(10):1354-1363.
- 367 19. Lou H, Huang Y, Ouyang Y, et al. Artemisia annua-sublingual immunotherapy for  
368 seasonal allergic rhinitis: A randomized controlled trial. *Allergy*. 2020.
- 369 20. Cantillo JF, Puerta L, Lafosse-Marin S, Subiza JL, Caraballo L, Fernandez-Caldas E.  
370 Allergens involved in the cross-reactivity of *Aedes aegypti* with other arthropods. *Ann*

- 371 *Allergy Asthma Immunol.* 2017;118(6):710-718.
- 372 21. Valmonte GR, Cauyan GA, Ramos JD. IgE cross-reactivity between house dust mite  
373 allergens and *Ascaris lumbricoides* antigens. *Asia Pacific allergy.* 2012;2(1):35-44.
- 374 22. Santos AB, Chapman MD, Aalberse RC, et al. Cockroach allergens and asthma in  
375 Brazil: identification of tropomyosin as a major allergen with potential cross-  
376 reactivity with mite and shrimp allergens. *J Allergy Clin Immunol.* 1999;104(2 Pt  
377 1):329-337.
- 378 23. Resch Y, Weghofer M, Seiberler S, et al. Molecular characterization of Der p 10: a  
379 diagnostic marker for broad sensitization in house dust mite allergy. *Clin Exp Allergy.*  
380 2011;41(10):1468-1477.
- 381 24. Gao Z, Fu WY, Sun Y, et al. Artemisia pollen allergy in China: Component-resolved  
382 diagnosis reveals allergic asthma patients have significant multiple allergen  
383 sensitization. *Allergy.* 2019;74(2):284-293.
- 384 25. Sun JL, Shen L, Chen J, Yu JM, Yin J. Species diversity of house dust mites in  
385 Beijing, China. *Journal of medical entomology.* 2013;50(1):31-36.
- 386 26. M P, S H, R S, C D. Allergen cross-reactivity in allergic rhinitis and oral-allergy  
387 syndrome: a bioinformatic protein sequence analysis. *International forum of allergy  
388 & rhinology.* 2014;4(7):559-564.
- 389 27. Wang M, Zhang Y, Han D, Zhang L. Association between polymorphisms in cytokine  
390 genes IL-17A and IL-17F and development of allergic rhinitis and comorbid asthma  
391 in Chinese subjects. *Human immunology.* 2012;73(6):647-653.
- 392 28. Ciprandi G, De Amici M, Murdaca G, et al. Serum interleukin-17 levels are related to  
393 clinical severity in allergic rhinitis. *Allergy.* 2009;64(9):1375-1378.
- 394

396 **Table 1.** Demographic and clinical characteristics of house dust mite-positive allergic rhinitis patients  
 397 investigated.

|                                | <b>Monosensitization<br/>(n=321) (64.4%)</b> | <b>Polysensitization<br/>(n=176) (35.4%)</b> | <b>P value</b> | <b>Odds<br/>ratio</b> | <b>95%CI</b> |
|--------------------------------|----------------------------------------------|----------------------------------------------|----------------|-----------------------|--------------|
| <b>Gender</b>                  |                                              |                                              | 0.058          | 0.690                 | 0.470-1.012  |
| Male                           | 158 (49.22)                                  | 101 (57.39)                                  |                |                       |              |
| Female                         | 163 (50.78)                                  | 75 (42.61)                                   |                |                       |              |
| Age                            | 29.60±11.55                                  | 28.77±12.09                                  | 0.449          |                       |              |
| Family history of AR           | 69 (21.50)                                   | 54 (30.68)                                   | 0.056          | 1.522                 | 0.989-2.342  |
| Smoking and drink              | 222 (69.16)                                  | 99 (56.25)                                   | 0.003*         | 0.560                 | 0.381-0.823  |
| Co-morbid Allergic status      |                                              |                                              |                |                       |              |
| Asthma                         | 29 (9.03)                                    | 34 (19.32)                                   | 0.001*         | 2.486                 | 1.448-4.267  |
| Atopic Dermatitis              | 28 (8.72)                                    | 24 (13.64)                                   | 0.118          | 1.506                 | 0.818-2.772  |
| Allergic conjunctivitis        | 34 (10.59)                                   | 17 (9.66)                                    | 0.206          | 0.648                 | 0.331-1.269  |
| <b>HDM specific IgE (kU/L)</b> | 25.44±26.66                                  | 29.89±29.92                                  | 0.112          | 1.005                 | 0.999-1.012  |

398 \*P< 0.05, HDM= house dust mite.

399

400 **Table 2:** Amino acid sequences of *Artemisia annua* and *Artemisia sieversian* tropomyosin  
 401 fragments detected by mass spectrometry.

| Mugwort                     |                                         |         |                       |
|-----------------------------|-----------------------------------------|---------|-----------------------|
| Species                     | Names                                   | Conf. % | Sequence              |
| <i>Artemisia annua</i>      | Actin-binding, cofilin/tropomyosin type | 99      | VGSPDESYEDFTNSLPSNECR |
|                             | Actin-binding, cofilin/tropomyosin type | 99      | IEEQQVIVEK            |
| <i>Artemisia sieversian</i> | Actin-binding, cofilin/tropomyosin type | 99      | IEEQQVIVEK            |
|                             | Actin-binding, cofilin/tropomyosin type | 99      | VGSPDESYEDFTNSLPSNECR |

402

403 **FIGURE LEGENDS**

404 **Figure 1. A :** The distribution of allergen types, according to the concentrations of  
405 house dust mite (HDM) specific IgE in polysensitized HDM<sup>+</sup> allergic rhinitis (AR)  
406 patients. Food allergens included crab, shrimp, soybean, sea fish mix 1, egg white,  
407 beef, cow's milk, peanut and mutton; while inhalant allergens included cat, mould  
408 mix 1, mugwort, hops, common ragweed, dog, cockroach, German, tree mix 2 and  
409 house dust. **B :** The prevalence of inhalant allergens in polysensitized HDM<sup>+</sup>AR  
410 patients (n=176). **C :** The positive rate of monosensitized and polysensitized  
411 HDM<sup>+</sup>AR patients in recruited outpatients from January 2018 to December 2018  
412 (n=15354).

413 **Figure 2. A:** Structural comparison of tropomyosin of *Artemisia annua* (*A. annua*)  
414 and *Dermatophagoides pteronyssinus* 10 (Der p10). The target sequence of homology  
415 modelling tropomyosin of *A. annua* was established on the SWISS-MODEL server  
416 eEF1A2 (Swiss-Prot Accession No: Q05639). The amino acid sequences of each  
417 protein were then loaded into the SWISS-MODEL server to predict a 3D model. **B:**  
418 Concentrations of house dust mite (HDM)-specific IgE in the serum of HDM<sup>+</sup> allergic  
419 rhinitis (AR) patients (n = 15) incubated in the absence or presence of synthesized  
420 tropomyosin peptides of mugwort; **C:** Tropomyosin of *Artemisia annua* (*A. annua*)  
421 peptide inhibits IgE-binding to *Dermatophagoides pteronyssinus* 10 (Der p10)  
422 measuring by ELISA. Tropomyosin of *A. annua* exhibits inhibitory effect in 4 out of 8  
423 patients at the concentration of 50 ng/mL. **D:** The expression of basophils  
424 (CCR3<sup>+</sup>CD123<sup>+</sup>CD63<sup>+</sup>) with stimulations of Der p10 and tropomyosin of *A. annua*

425 peptide stimulations. Totally, HDM specific IgE pre-incubated basophils from 2 out  
426 of 8 patients were activated by tropomyosin of *A. annua*.

427 **Figure 3.** Effect of specific antigen on release of IL-17, IL-5 and IFN- $\gamma$  in peripheral  
428 blood mononuclear cells (PBMCs) of HDM+ allergic rhinitis (AR) patients or healthy  
429 controls. **A:** Stimulation of PBMCs of monosensitized HDM<sup>+</sup>AR patients and control  
430 subject with house dust mite (HDM) (n = 6); **B:** Stimulation of PBMC of  
431 monosensitized HDM<sup>+</sup>AR patients (n = 8) and control subjects (n = 5) with *Artemisia*  
432 *annua* (*A. annua*); **C:** The positive ratio of cytokine produced by PBMCs of  
433 monosensitized HDM<sup>+</sup> allergic rhinitis or controls upon HDM and *A. annua*  
434 stimulation. **D:** Concentrations of IL-17, IL-5 and IFN- $\gamma$  released in PBMCs  
435 stimulated with synthesized tropomyosin peptides of *A. annua* and Der p10 (n = 4).

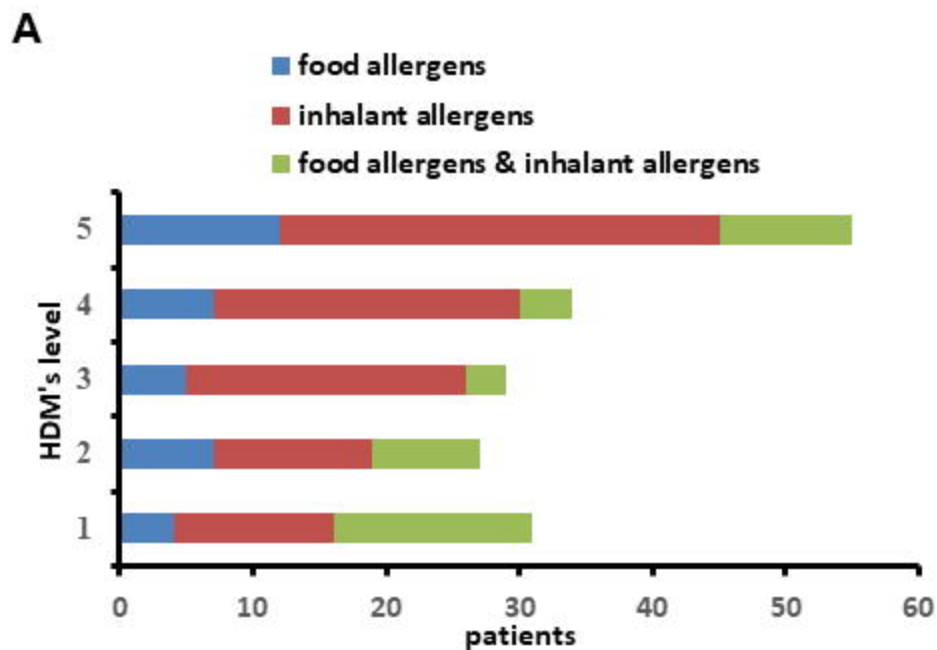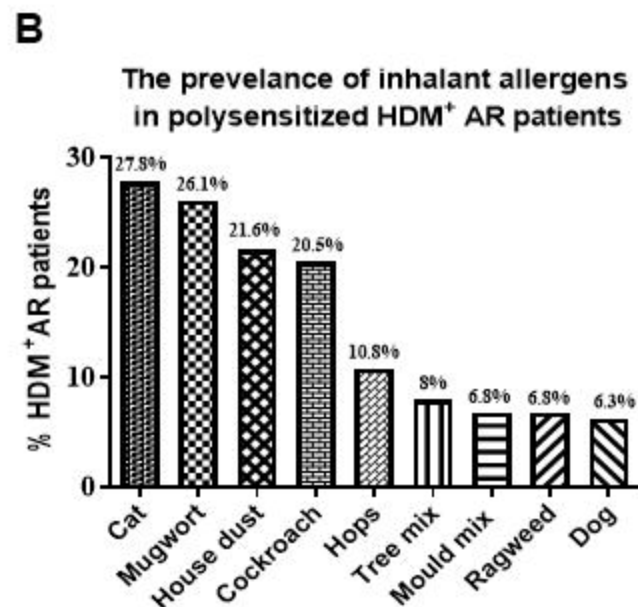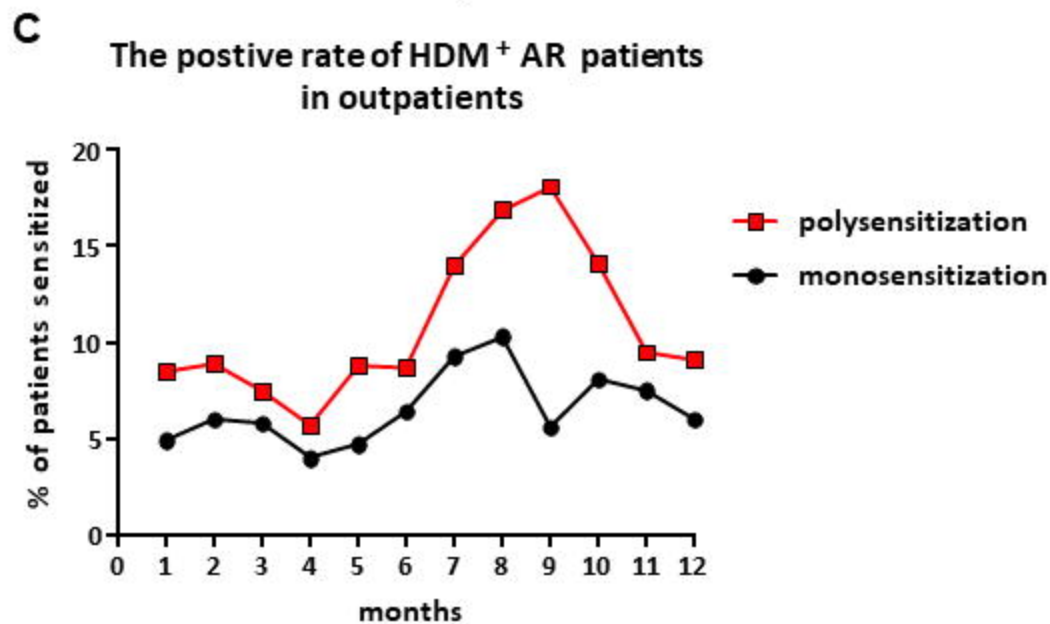

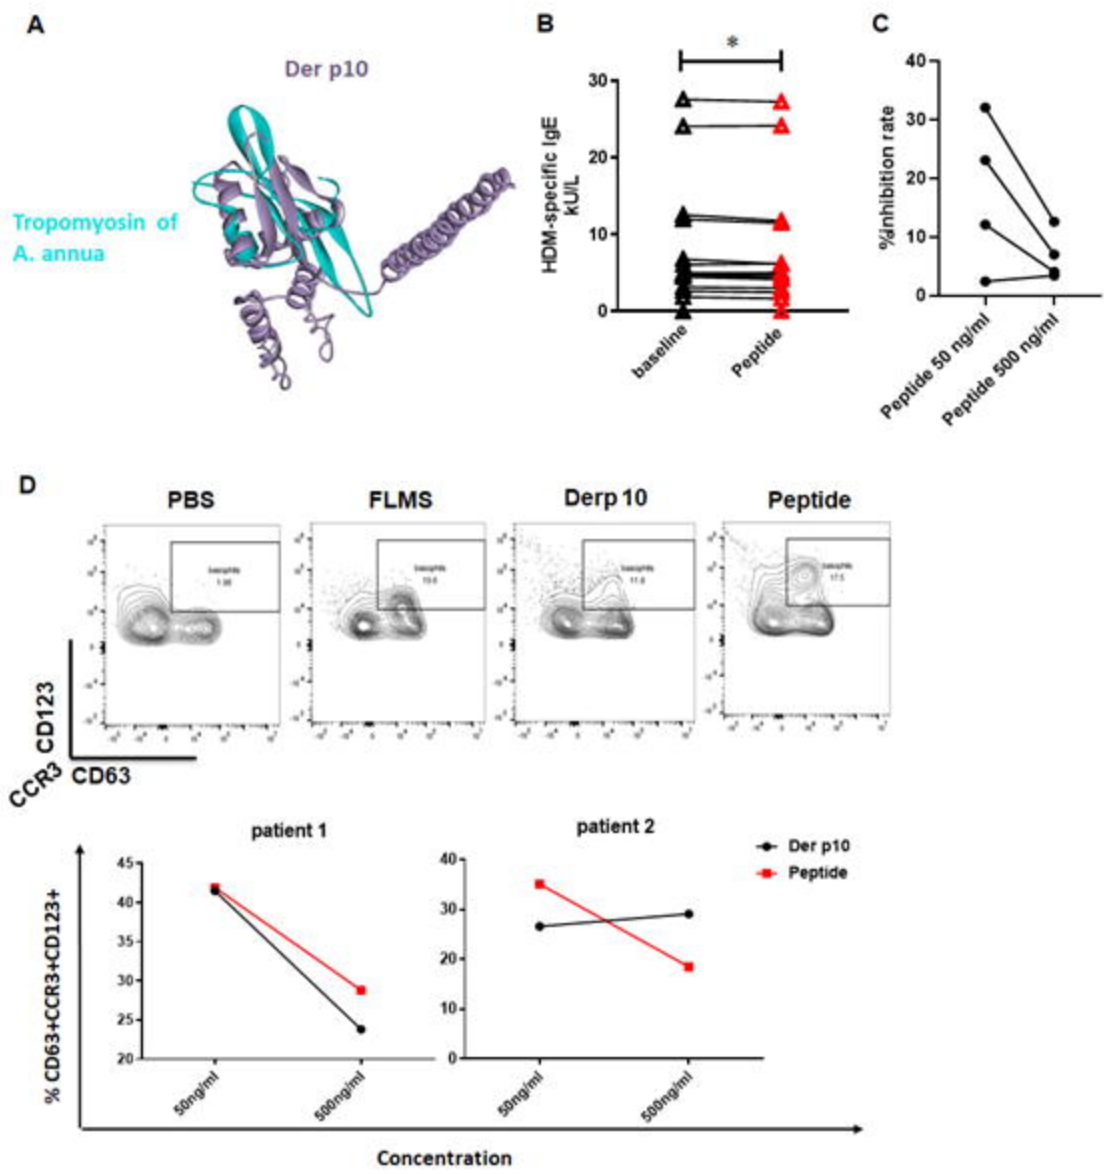

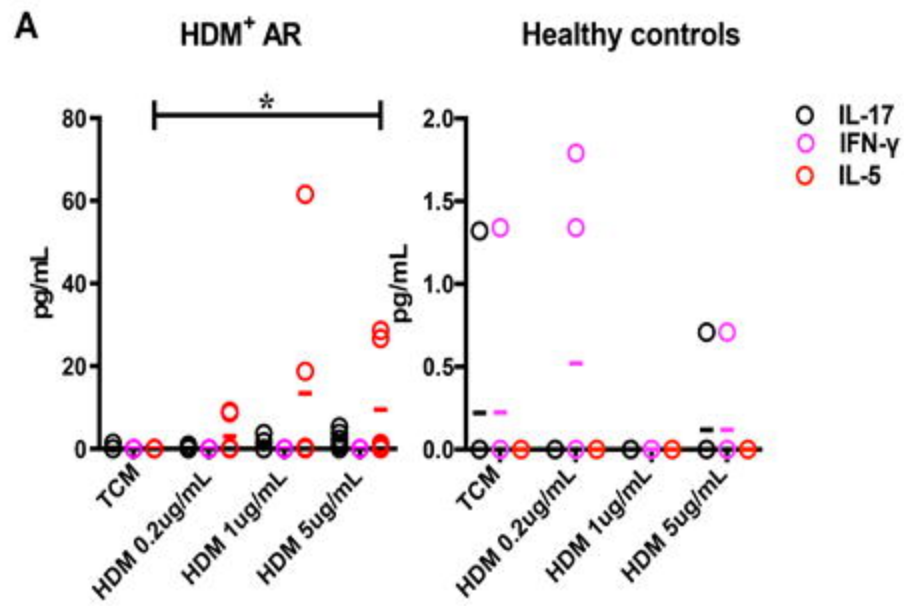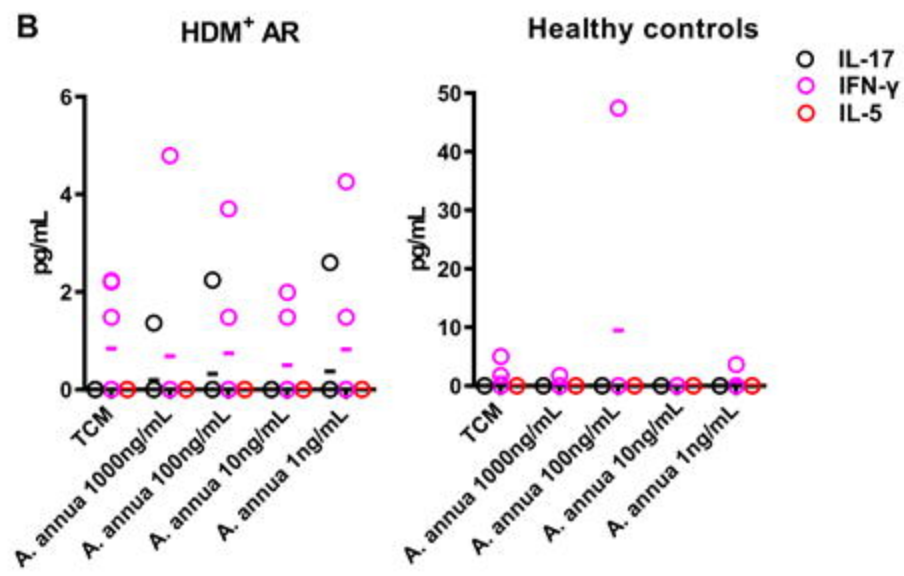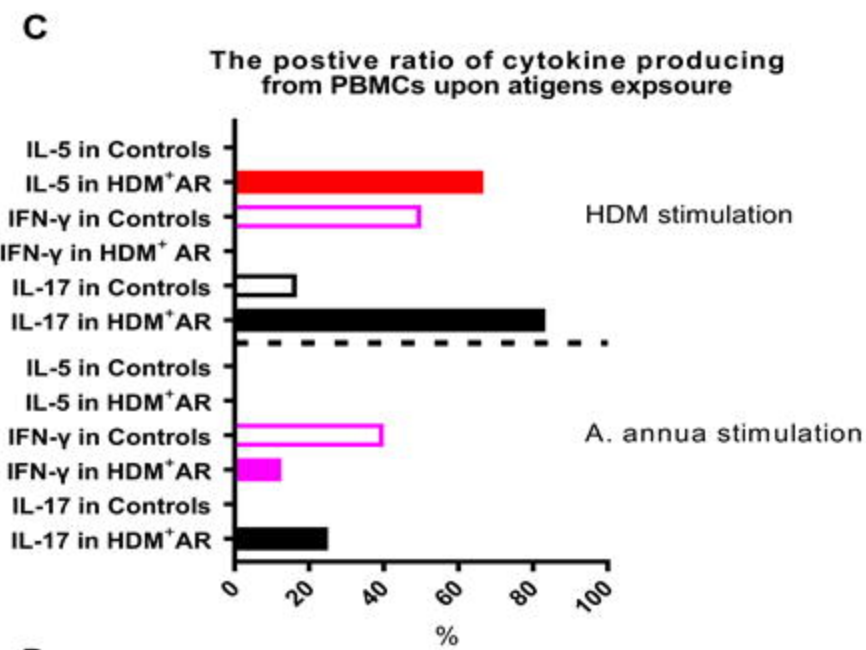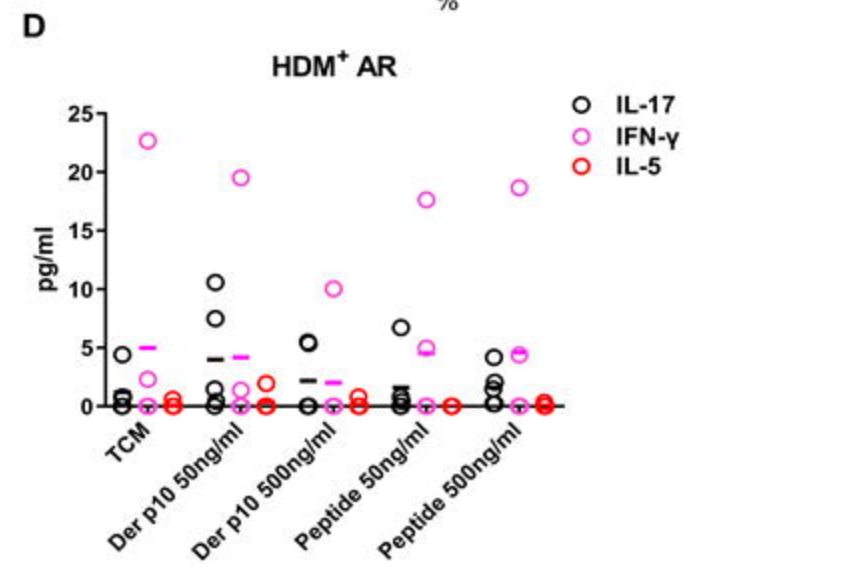

Source: https://www.biorxiv.org/content/10.1101/2020.10.13.338533v1.full.pdf
